# Supplementary material
Source: HighWire-hosted journal article supplement (https://rmdopen.bmj.com/content/9/2/e003099)

---

**Additional file 1: Completed Consolidated criteria for reporting qualitative studies (COREQ): 32-item checklist**

Developed from:

Tong A, Sainsbury P, Craig J. Consolidated criteria for reporting qualitative research (COREQ): a 32-item checklist for interviews and focus groups. *International Journal for Quality in Health Care*. 2007. Volume 19, Number 6: pp. 349 – 357

| No. Item                                       | Guide questions/description                                                                                                               | Reported on Page No. |
|------------------------------------------------|-------------------------------------------------------------------------------------------------------------------------------------------|----------------------|
| <b>Domain 1: Research team and reflexivity</b> |                                                                                                                                           |                      |
| <i>Personal Characteristics</i>                |                                                                                                                                           |                      |
| 1. Interviewer/facilitator                     | Which author/s conducted the interview or focus group?                                                                                    | Page 6               |
| 2. Credentials                                 | What were the researcher's credentials? E.g. PhD, MD                                                                                      | Page 6               |
| 3. Occupation                                  | What was their occupation at the time of the study?                                                                                       | Page 6               |
| 4. Gender                                      | Was the researcher male or female?                                                                                                        | Page 6               |
| 5. Experience and training                     | What experience or training did the researcher have?                                                                                      | Page 6               |
| <i>Relationship with participants</i>          |                                                                                                                                           |                      |
| 6. Relationship established                    | Was a relationship established prior to study commencement?                                                                               | Page 6               |
| 7. Participant knowledge of the interviewer    | What did the participants know about the researcher? e.g. personal goals, reasons for doing the research                                  | Page 7               |
| 8. Interviewer characteristics                 | What characteristics were reported about the interviewer/facilitator? e.g. Bias, assumptions, reasons and interests in the research topic | Page 6               |

|                                          |                                                                                                                                                          |                                      |
|------------------------------------------|----------------------------------------------------------------------------------------------------------------------------------------------------------|--------------------------------------|
| <b>Domain 2: study design</b>            |                                                                                                                                                          |                                      |
| <i>Theoretical framework</i>             |                                                                                                                                                          |                                      |
| 9. Methodological orientation and Theory | What methodological orientation was stated to underpin the study? e.g. grounded theory, discourse analysis, ethnography, phenomenology, content analysis | Page 5                               |
| <i>Participant selection</i>             |                                                                                                                                                          |                                      |
| 10. Sampling                             | How were participants selected? e.g. purposive, convenience, consecutive, snowball                                                                       | Page 6                               |
| 11. Method of approach                   | How were participants approached? e.g. face-to-face, telephone, mail, email                                                                              | Page 6                               |
| 12. Sample size                          | How many participants were in the study?                                                                                                                 | Page 7                               |
| 13. Non-participation                    | How many people refused to participate or dropped out? Reasons?                                                                                          | Page 7                               |
| <i>Setting</i>                           |                                                                                                                                                          |                                      |
| 14. Setting of data collection           | Where was the data collected? e.g. home, clinic, workplace                                                                                               | Page 6                               |
| 15. Presence of non-participants         | Was anyone else present besides the participants and researchers?                                                                                        | Page 6                               |
| 16. Description of sample                | What are the important characteristics of the sample? e.g. demographic data, date                                                                        | Page 8 (Table 1)                     |
| <i>Data collection</i>                   |                                                                                                                                                          |                                      |
| 17. Interview guide                      | Were questions, prompts, guides provided by the authors? Was it pilot tested?                                                                            | Page 7                               |
| 18. Repeat interviews                    | Were repeat interviews carried out? If yes, how many?                                                                                                    | N/A – single interview (Page 6)      |
| 19. Audio/visual recording               | Did the research use audio or visual recording to collect the data?                                                                                      | Page 6                               |
| 20. Field notes                          | Were field notes made during and/or after the interview or focus group?                                                                                  | Page 6                               |
| 21. Duration                             | What was the duration of the interviews or focus group?                                                                                                  | Page 6                               |
| 22. Data saturation                      | Was data saturation discussed?                                                                                                                           | Page 6                               |
| 23. Transcripts returned                 | Were transcripts returned to participants for comment and/or correction?                                                                                 | N/A – transcripts were not returned. |

|                                        |                                                                                                                                 |                                       |
|----------------------------------------|---------------------------------------------------------------------------------------------------------------------------------|---------------------------------------|
|                                        |                                                                                                                                 |                                       |
| <b>Domain 3: analysis and findings</b> |                                                                                                                                 |                                       |
| <i>Data analysis</i>                   |                                                                                                                                 |                                       |
| 24. Number of data coders              | How many data coders coded the data?                                                                                            | Page 7                                |
| 25. Description of the coding tree     | Did authors provide a description of the coding tree?                                                                           | Page 8 (Additional file 4)            |
| 26. Derivation of themes               | Were themes identified in advance or derived from the data?                                                                     | Page 7                                |
| 27. Software                           | What software, if applicable, was used to manage the data?                                                                      | Page 7                                |
| 28. Participant checking               | Did participants provide feedback on the findings?                                                                              | N/A – no.                             |
| <i>Reporting</i>                       |                                                                                                                                 |                                       |
| 29. Quotations presented               | Were participant quotations presented to illustrate the themes/findings? Was each quotation identified? e.g. participant number | Pages 12-18 (Tables 3-5).             |
| 30. Data and findings consistent       | Was there consistency between the data presented and the findings?                                                              | Pages 12-18 (Tables 3-5); pages 19-25 |
| 31. Clarity of major themes            | Were major themes clearly presented in the findings?                                                                            | Pages 19-25                           |
| 32. Clarity of minor themes            | Is there a description of diverse cases or discussion of minor themes?                                                          | Page 19; Page 24                      |

---

## Additional file 2: Topic guide (at-risk participants)

### **RA/Systemic health**

- When were you first told about your risk of arthritis? CCP+ test?
  - How did you receive this news?
  - Do you understand what this risk means?
- What do you understand by someone having RA?
  - Do you have family members with RA or any experience of RA?
  - Do you have any symptoms? If so what? E.g. joint pain
  - What is the impact on your life/if any? E.g. fatigue
- Have your health priorities changed since you found out you were at risk of developing RA?
- Could you describe your top 5 health priorities since CCP+ test?
  - What about your teeth and gums?
  - How important is this?

What do you understand around the link between gum disease and RA? Have you ever heard about a link before?

### **Barriers and facilitators for keeping your mouth healthy?**

- Do you feel you have healthy teeth and gums?
  - If not- why?
  - What makes you think that?
    - Is there anything you would like to change/would you like to improve your teeth and gums?
- What do you do regularly to look after your teeth and gums?
  - At home? Cleaning/flossing/diet etc. how/when/how often
  - Seeing dentist/hygienist? how/when/how often
- Has any of this changed since you were told of your risk of RA?
- Does anything get in the way of you looking after your teeth and gums and/or visiting dentist?
  - Health issues
  - Dexterity in hands
  - Other commitments (work/family) and time
  - Are you a regular attender at the dentist?
  - Do you have a dentist? Can you get to the dentist?
  - Is cost an issue at the dentist or for making any of the suggested changes to the way you look after your teeth and gums?

### **Acceptability of periodontal care in treatment plan of individuals at risk of developing RA**

- Knowing that there is a link between your gums and developing RA do you think you should be offered help with this?
  - How would you want that help? What's the main challenge for you?
  - At home – remembering/cleaning/flossing
  - Better toothbrush or other things to use at home

- 
- Getting a dentist? Getting to a dental appointment?
  - Cost of dentist? Cost of getting to a dentist?
  - Advice from rheumatology team?
  - Further information? From who? And how want it – verbal/written/app?

### **Shared risk factors**

Have you heard about any other links with developing RA?

- Are you aware of the effect of smoking on your health in particular your mouth
  - What about the link with developing RA?
  - What do you think about help with stopping smoking being offered as part of the study?
- Are you aware of the effect that your diet and gut bacteria has on your health?
- What about the link that your diet and gut bacteria has to developing RA?
- Would you also be willing to change your diet following advice from a health professional, take a prescribed supplement (purified yoghurt) or an antibiotic to reduce your risk?

### **Factors influencing your participation in the research project**

#### **Knowledge of and weighing up pros and cons of preventative intervention**

- What encourages/would encourage you to participate in a study that would provide dental and in particular gum treatment with a view of potentially helping your joints (Caveat)
  - Pain free treatment
  - Resolving your pain
  - On-off appointment vs longer-term treatment
  - Would gender of the dentist influence your decision
- What would be the main challenge for you to taking part in such a study?
  - Anxiety – Of dentist? Treatment? Pain? Discomfort?
    - Types/cause/experiences
    - Specific fears
    - Onset
    - Coping Strategies
  - Barriers to care if any
    - Language/cultural difficulties
    - Fear/embarrassment
    - Time commitment

What could we do to overcome these challenges and encourage you to take part?

---

### **Additional file 3: Topic guide (healthcare professional participants)**

#### **Introduction**

- Introduction to the study
- Explain about confidentiality and recording

#### **What is your current healthcare role?**

#### **What are your thoughts about the link between oral and general health?**

#### **In your experience is there any/enough collaboration between medicine and dentistry?**

#### **Can you think of any examples of areas where there could be more collaboration between medicine and dentistry? How about MDT meetings having a DCP input?**

#### **What do you think are the main challenges of working more collaboratively between medicine and dentistry?**

- Would it be important/necessary?
- Is it happening already? If yes, is it enough? If no, why not?
- What would make it easier?
- What is your individual experience?

#### **Have they ever told the patients that there is a link?**

- Communicate about the risk?

#### **What is the problem?**

#### **Do you see any utility to engage with patients about prevention?**

- Would this new understanding help motivate patients?

#### **Why the diabetes commissioning guide not being used?**

#### **What opportunities do you see?**

- for including periodontal care in treatment plan of individuals at risk of developing RA
- Would you do it?
- How?

#### **What are the main barriers and facilitators for care provision in this group from your perspective**

- What would make a difference from your perspective?
- Would non-inferiority with a pharmacological intervention make a difference? For policy, integrated care pathway?
- What about prevention?

---

**Additional file 4: Example of coding tree (Theme 2, subtheme 2)**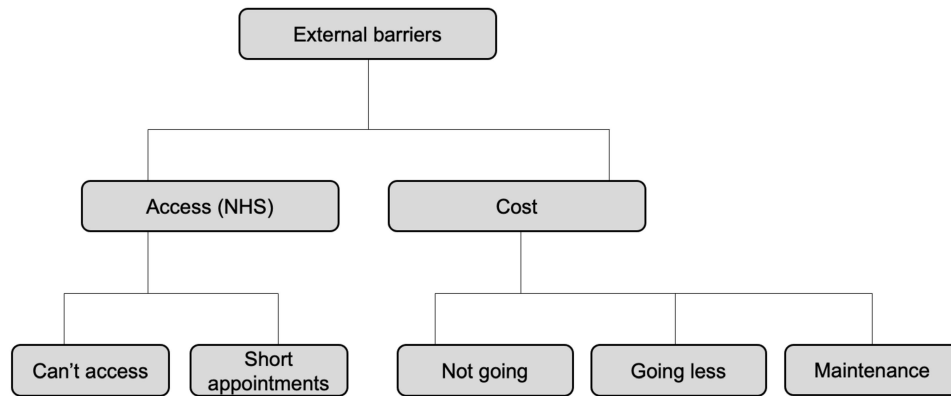

Supplement: inline-supplementary-material-1 [file inline-supplementary-material-1.pdf]
